# Supplementary material for: A novel multifunctional flame retardant MXene/nanosilica hybrid for poly(vinyl alcohol) with simultaneously improved mechanical properties
Source: Royal Society of Chemistry journal article supplement (doi:10.1039/d0nj04897f), 2021-01-01
Supplement: d0nj04897f1.pdf [file d0nj04897f1.pdf]

## Electronic Supporting Information

### A novel multifunctional flame retardant MXene/nanosilica hybrid for poly (vinyl alcohol) with simultaneously improved mechanical properties

Haozhe Ning<sup>a,b</sup>, Zhongying Ma<sup>a,b</sup>, Zhihao Zhang<sup>a,b</sup>, Dan Zhang<sup>a,b</sup>, Yuhua Wang<sup>a,b,\*</sup>

<sup>a</sup>Department of Material Science, School of Physical Science and Technology,  
Lanzhou University, Lanzhou, 730000, China

<sup>b</sup>Key Laboratory of Special Function Materials and Structure Design, Ministry of  
Education, China

a,b\*(Corresponding author E-mail address: wyh@lzu.edu.cn;

**Table S 1** The variance and standard deviation of PHRR in PVA and its flame retardant composites.

| Samples     | s <sup>2</sup> of PHRR | s of PHRR |
|-------------|------------------------|-----------|
| PVA         | 1.745                  | 1.321     |
| MXene/PVA   | 5.946                  | 2.438     |
| m-MXene/PVA | 2.816                  | 1.678     |

**Table S 2** Tensile modulus of PVA and its nanocomposites.

| Samples      | Tensile modulus(Mpa) |
|--------------|----------------------|
| PVA          | 1790.01              |
| MXene1/PVA   | 1830.89              |
| m-MXene1/PVA | 1975.24              |
| MXene2/PVA   | 2183.07              |
| m-MXene2/PVA | 2278.98              |

**Table S 3** The variance and standard deviation of Tensile Strength and Elongation at Break in PVA and its flame retardant composites.

| Samples     | s <sup>2</sup> of Tensile Strength | s of Tensile Strength | s <sup>2</sup> of Elongation at Break | s of Elongation at Break |
|-------------|------------------------------------|-----------------------|---------------------------------------|--------------------------|
| PVA         | 2.234                              | 1.495                 | 16.222                                | 4.028                    |
| MXene/PVA   | 7.642                              | 2.764                 | 42.667                                | 6.532                    |
| m-MXene/PVA | 2.852                              | 1.689                 | 21.556                                | 4.643                    |

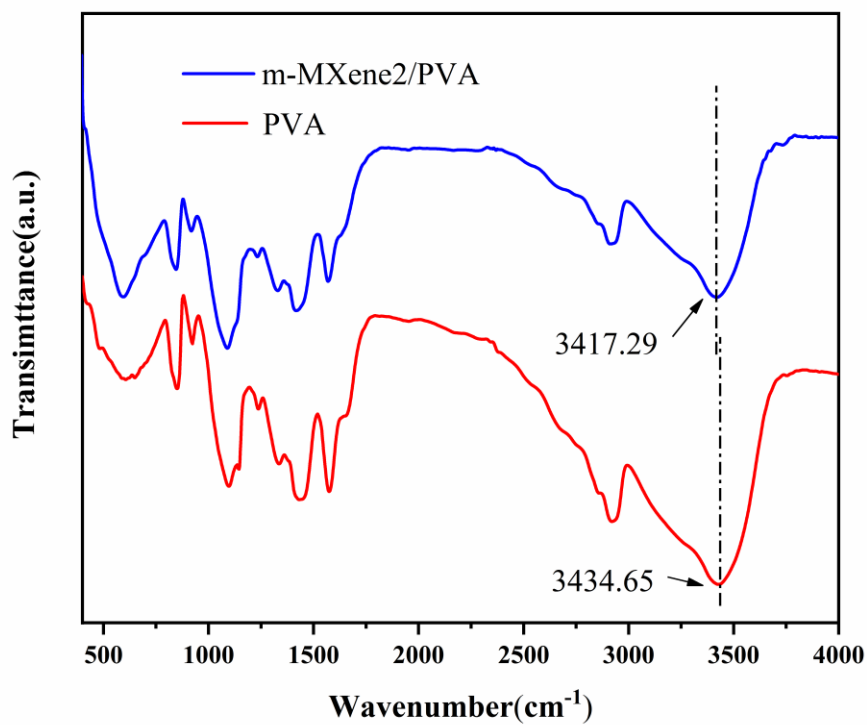

Figure S 1 FTIR of PVA and its composite.

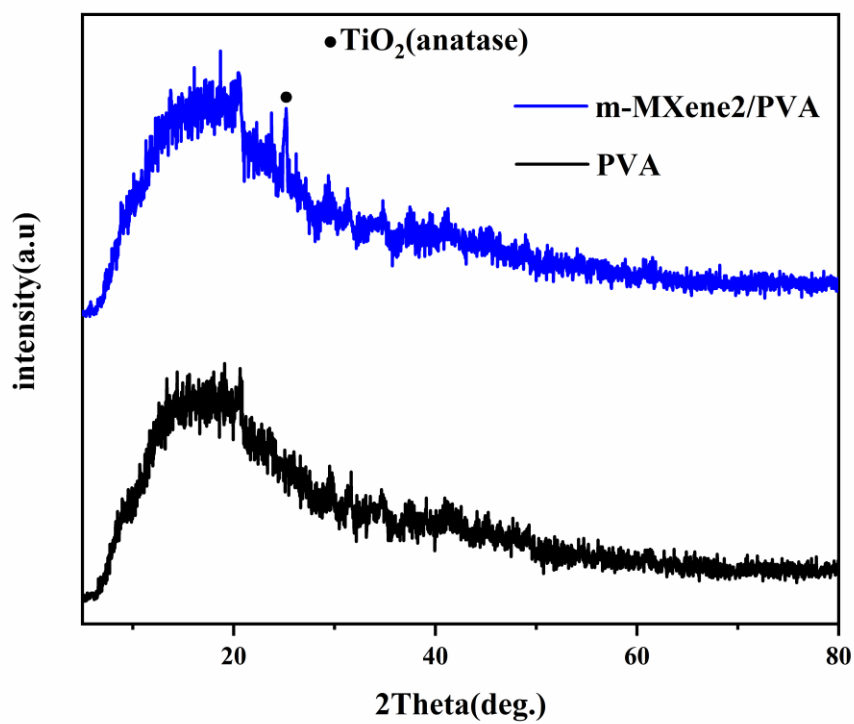

Figure S 2 XRD of the char residues for PVA and m-MXene2/PVA.
