# Supplementary figures and images for: A novel multifunctional flame retardant MXene/nanosilica hybrid for poly(vinyl alcohol) with simultaneously improved mechanical properties
Source: Royal Society of Chemistry journal article supplement (doi:10.1039/d0nj04897f), 2021-01-01

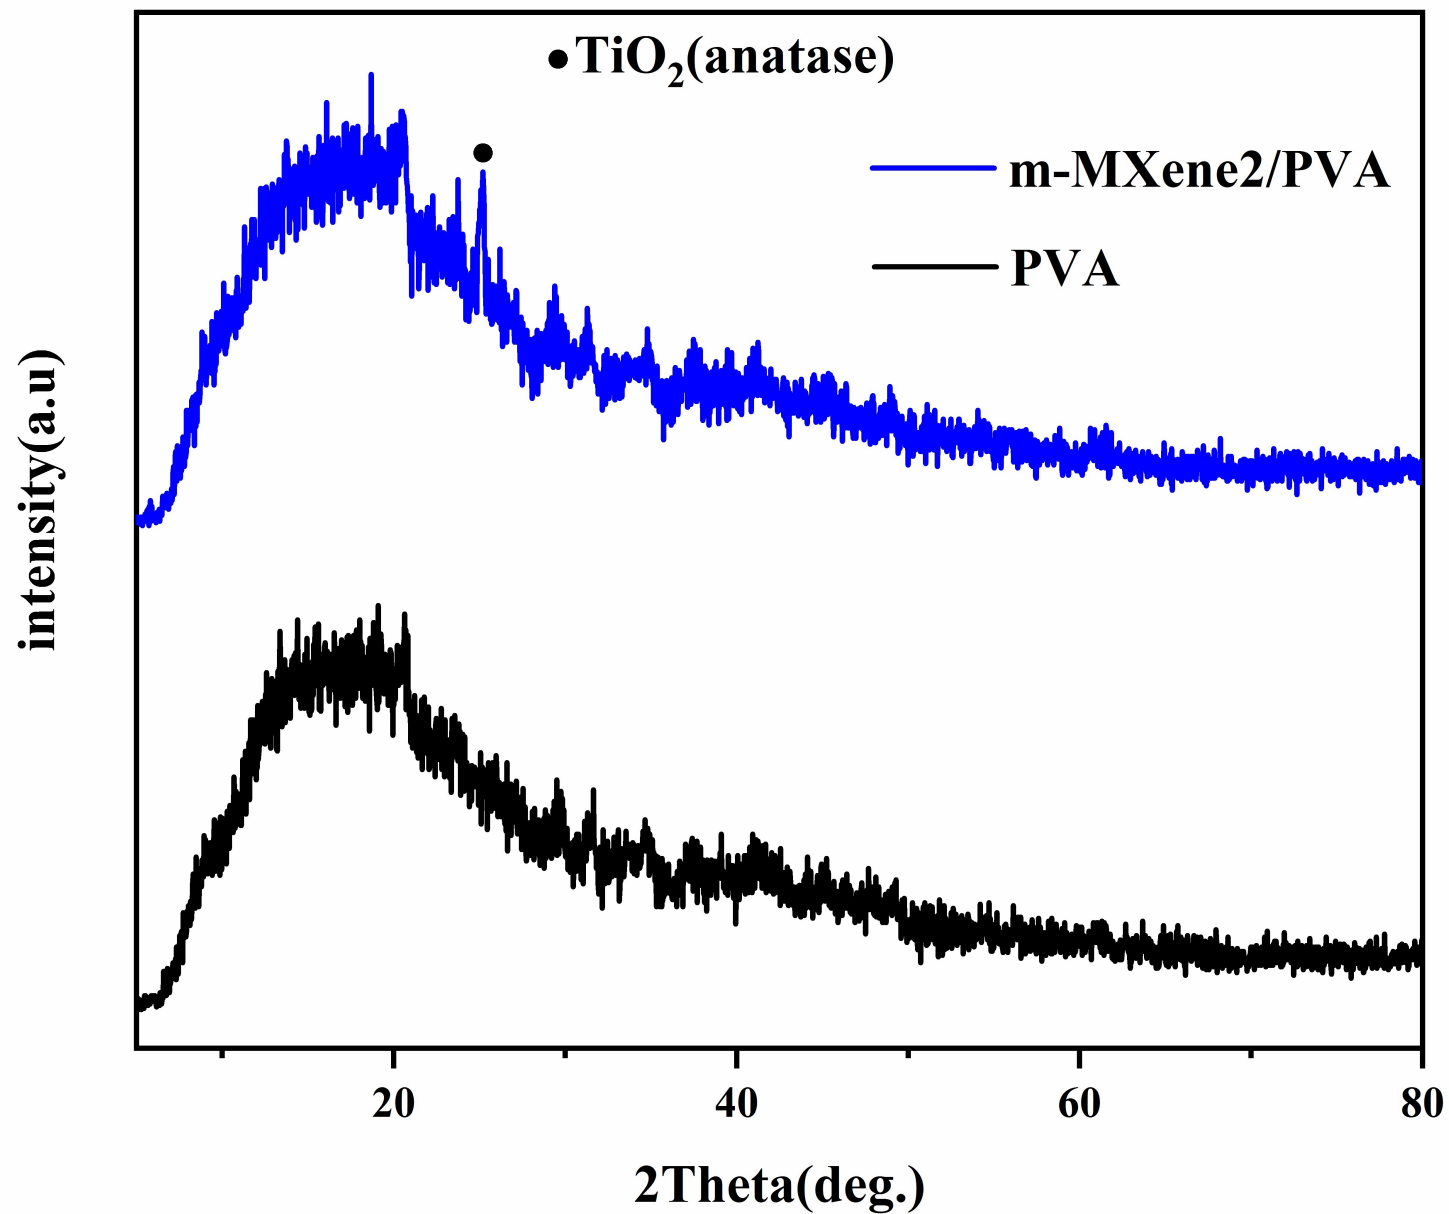

Supplement: d0nj04897f3.pdf [file d0nj04897f3.pdf]
